# Supplementary material
Source: Springer Nature journal article supplement (https://www.springermedizin.de/resource/supplementary/12889_2012_5024_MOESM5_ESM.pdf/9493224)
Supplement: MOESM5 [file 9493224]

**Table 2**

Crude odds ratios for self-reported health status, lifestyle behaviours and health service utilisation for migrants (n<sub>raw</sub>=1543)

|                                                               | <b>Registered<br/>(n=793)</b> | <b>Migrants<br/>(n=750)</b> | <b>Migrants<br/>Crude OR<br/>(95% C.I.)</b> |
|---------------------------------------------------------------|-------------------------------|-----------------------------|---------------------------------------------|
|                                                               | n (%)                         | n (%)                       |                                             |
| Age-comparative perceived health status (better) <sup>1</sup> | 311 (39.5)                    | 329 (44.9)                  | 1.00 (0.66, 1.52)                           |
| Smoking status - current smoker <sup>2</sup>                  | 202 (25.5)                    | 239 (31.9)                  | 1.32 (1.04, 1.67)                           |
| Alcohol drinker pattern - regular drinker <sup>2</sup>        | 564 (71.1)                    | 547 (72.9)                  | 1.01 (0.80, 1.28)                           |
| Chronic disease diagnosis <sup>3</sup>                        | 119 (15.0)                    | 63 (8.4)                    | 0.48 (0.34, 0.67)                           |
| Health problem in previous 30 days <sup>3</sup>               | 155 (19.5)                    | 125 (16.7)                  | 0.83 (0.63, 1.10)                           |
| Doctor consultation in previous 30 days <sup>3</sup>          | 53 (6.7)                      | 37 (4.9)                    | 0.67 (0.43, 1.06)                           |
| Hospital admission in previous 12 months <sup>3</sup>         | 38 (4.8)                      | 22 (2.9)                    | 0.51 (0.29, 0.89)                           |
| Source of healthcare service utilisation <sup>4</sup>         |                               |                             |                                             |
| Tier 1 (Community health centre and private clinics)          | 128 (16.1)                    | 159 (21.2)                  | 1                                           |
| Tier 2 (Regional hospital)                                    | 134 (16.9)                    | 159 (21.2)                  | 0.98 (0.69, 1.38)                           |
| Tier 3 (Municipal/ Provincial hospital)                       | 291 (36.7)                    | 168 (22.4)                  | 0.45 (0.32, 0.61)                           |

Note: C.I. denotes lower and upper limit of 95% confidence interval

<sup>1</sup>Age-comparative perceived health status was dichotomised (reference = worse)

<sup>2</sup>Smoking status and alcohol drinking pattern were dichotomised (reference = never smoker/drinker)

<sup>3</sup>Variables were dichotomised chronic disease diagnosis (reference = absence of disease), health problems in previous 30 days (reference = none), doctor consultation in previous 30 days (reference = none), hospitalisation in previous 12 months (reference= none)

<sup>4</sup>Source of healthcare service utilisation was segregated into three tiers (Box 2) (reference = tier 1)
